# Supplementary material for: Examining the Association between Coffee Intake and the Risk of Developing Irritable Bowel Syndrome: A Systematic Review and Meta-Analysis
Source: MDPI journal article supplement (doi:10.3390/nu15224745), 2023-11-10
Supplement: s1 [file s1]

## **Supplementary Material**

Table S1. Full search strategy for the various databases

### **PubMed**

|    |                                       |                                                                                                                                                                                                                                       |
|----|---------------------------------------|---------------------------------------------------------------------------------------------------------------------------------------------------------------------------------------------------------------------------------------|
| #1 | Irritable<br>bowel<br>syndrome<br>IBS | irritable bowel syndrome[MeSH Terms]<br><br>OR<br><br>("Irritable Bowel"[Text Word] OR "IBS"[Text Word] OR "Irritable Colon"[Text Word] OR "Mucous Colitis"[Text Word] OR "Spastic Colitis"[Text Word] OR "Spastic Colon"[Text Word]) |
| #2 | Coffee                                | coffee[MeSH Terms]<br><br>OR<br><br>"Coffee"[Text Word] OR "Caffeine"[Text Word] OR "Beverage"[Text Word]                                                                                                                             |

### **Embase**

|    |                                       |                                                                                                                                                                                                                       |
|----|---------------------------------------|-----------------------------------------------------------------------------------------------------------------------------------------------------------------------------------------------------------------------|
| #1 | Irritable<br>bowel<br>syndrome<br>IBS | 'Irritable bowel syndrome'/exp or 'irritable bowel syndrome':ti,ab or 'irritable bowel':ti,ab or 'IBS':ti,ab or 'irritable colon':ti,ab or 'mucous colitis':ti,ab or 'spastic colitis':ti,ab or 'spastic colon':ti,ab |
|----|---------------------------------------|-----------------------------------------------------------------------------------------------------------------------------------------------------------------------------------------------------------------------|

|    |        |                                                                        |
|----|--------|------------------------------------------------------------------------|
| #2 | Coffee | 'coffee'/exp or 'coffee':ti,ab or 'caffeine':ti,ab or 'beverage':ti,ab |
|----|--------|------------------------------------------------------------------------|

### Cochrane Library

|    |                                 |                                                                                                                                                                                                                                     |
|----|---------------------------------|-------------------------------------------------------------------------------------------------------------------------------------------------------------------------------------------------------------------------------------|
| #1 | Irritable bowel syndrome<br>IBS | MeSH descriptor: [Irritable Bowel Syndrome] explode all trees<br><br>OR<br><br>("irritable bowel syndrome" or "irritable bowel" or "IBS" or "irritable colon" or "mucous colitis" or "spastic colitis" or "spastic colon"):ti,ab,kw |
| #2 | Coffee                          | MeSH descriptor: [Coffee] explode all trees<br><br>OR<br><br>("coffee" or "caffeine" or "beverage"):ti,ab,kw                                                                                                                        |

Table S2. Newcastle Ottawa Scale for cross-sectional studies

| Study | Author                              | Year | Selection Bias Assessment (Maximum 4 stars) |                            |                           |                 | Comparability (Maximum 2 stars) |                   | Outcome (maximum 3 stars) |                  | Total (10/10) |
|-------|-------------------------------------|------|---------------------------------------------|----------------------------|---------------------------|-----------------|---------------------------------|-------------------|---------------------------|------------------|---------------|
|       |                                     |      | Representativeness of the sample            | Selection of control group | Ascertainment of exposure | Non-respondents | Main factor                     | Additional factor | Assessment of outcomes    | Statistical test |               |
| 1     | Khademolhosseini et al <sup>7</sup> | 2011 | *                                           | *                          | *                         | 0               | 0                               | 0                 | *                         | *                | 5/10          |
| 2     | Basandra et al <sup>8</sup>         | 2014 | 0                                           | *                          | 0                         | 0               | 0                               | 0                 | *                         | *                | 3/10          |
| 3     | Al Saadi et al <sup>24</sup>        | 2016 | 0                                           | *                          | *                         | 0               | 0                               | 0                 | *                         | *                | 4/10          |
| 4     | Kesuma et al <sup>25</sup>          | 2021 | *                                           | *                          | *                         | *               | 0                               | 0                 | *                         | *                | 6/10          |
| 5     | Koochakpoor et al <sup>26</sup>     | 2021 | *                                           | *                          | *                         | 0               | *                               | *                 | *                         | *                | 7/10          |
| 6     | El Sharawy et al <sup>27</sup>      | 2022 | 0                                           | *                          | *                         | 0               | 0                               | 0                 | *                         | *                | 4/10          |

Table S3. Newcastle Ottawa Scale for case-control studies

| Study | Author                 | Year | Selection Bias Assessment (Maximum 4 stars) |                                 |                       |                        | Comparability (Maximum 2 stars) |                   | Exposure (maximum 3 stars) |                                                     |                   | Total (9/9) |
|-------|------------------------|------|---------------------------------------------|---------------------------------|-----------------------|------------------------|---------------------------------|-------------------|----------------------------|-----------------------------------------------------|-------------------|-------------|
|       |                        |      | Is the case definition adequate?            | Representativeness of the cases | Selection of controls | Definition of controls | Main factor                     | Additional factor | Ascertainment of exposure  | Same method of ascertainment for cases and controls | Non-response rate |             |
| 1     | Guo et al <sup>8</sup> | 2015 | *                                           | *                               | *                     | *                      | *                               | *                 | *                          | *                                                   | *                 | 9/9         |

Table S4. Newcastle Ottawa Scale for cohort studies

| Study | Author                 | Year | Selection Bias Assessment (Maximum 4 stars) |                                      |                           |                                                           | Comparability (Maximum of 2 stars) |                   | Outcome (maximum 3 stars) |                           |                       | Total (9/9) |
|-------|------------------------|------|---------------------------------------------|--------------------------------------|---------------------------|-----------------------------------------------------------|------------------------------------|-------------------|---------------------------|---------------------------|-----------------------|-------------|
|       |                        |      | Representativeness of the exposed cohort    | Selection of the non-exposed control | Ascertainment of exposure | Outcome of interest not present at the start of the study | Age, sex, marital status           | Additional factor | Assessment of outcomes    | Sufficient follow-up time | Adequacy of follow-up |             |
| 1     | Wu et al <sup>28</sup> | 2023 | *                                           | *                                    | *                         | *                                                         | 0                                  | *                 | *                         | *                         | 0                     | 7/9         |
